# Supplementary material for: ASTN1 is associated with immune infiltrates in hepatocellular carcinoma, and inhibits the migratory and invasive capacity of liver cancer via the Wnt/β-catenin signaling pathway
Source: PubMed Central journal article supplement — Oncol Rep. 2020 Jul 24;44(4):1425–40. doi: 10.3892/or.2020.7704 (PMC7448461; doi:10.3892/or.2020.7704), 2020-07-24

Figure S1. Differential expression of ASTN1 between HCC tissues and adjacent samples in HCCDB. ASTN1, astrotactin 1; HCC, hepatocellular carcinoma; HCCDB, Integrative Molecular Database of Hepatocellular Carcinoma.

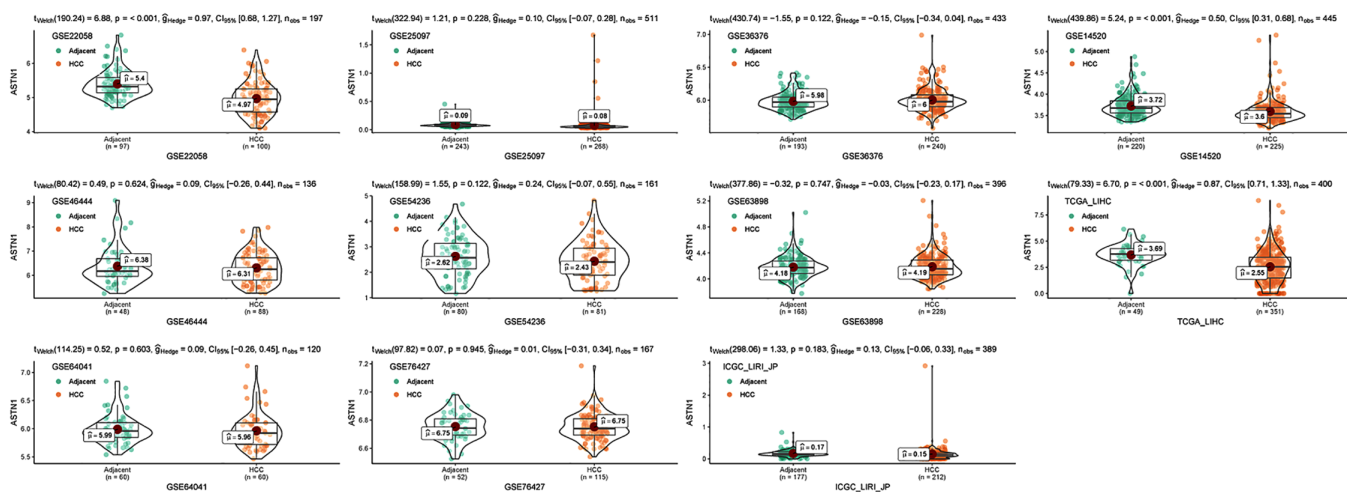

Figure S2. Correlation analysis between ASTN1 expression and immune marker genes. ASTN1, astrotactin 1.

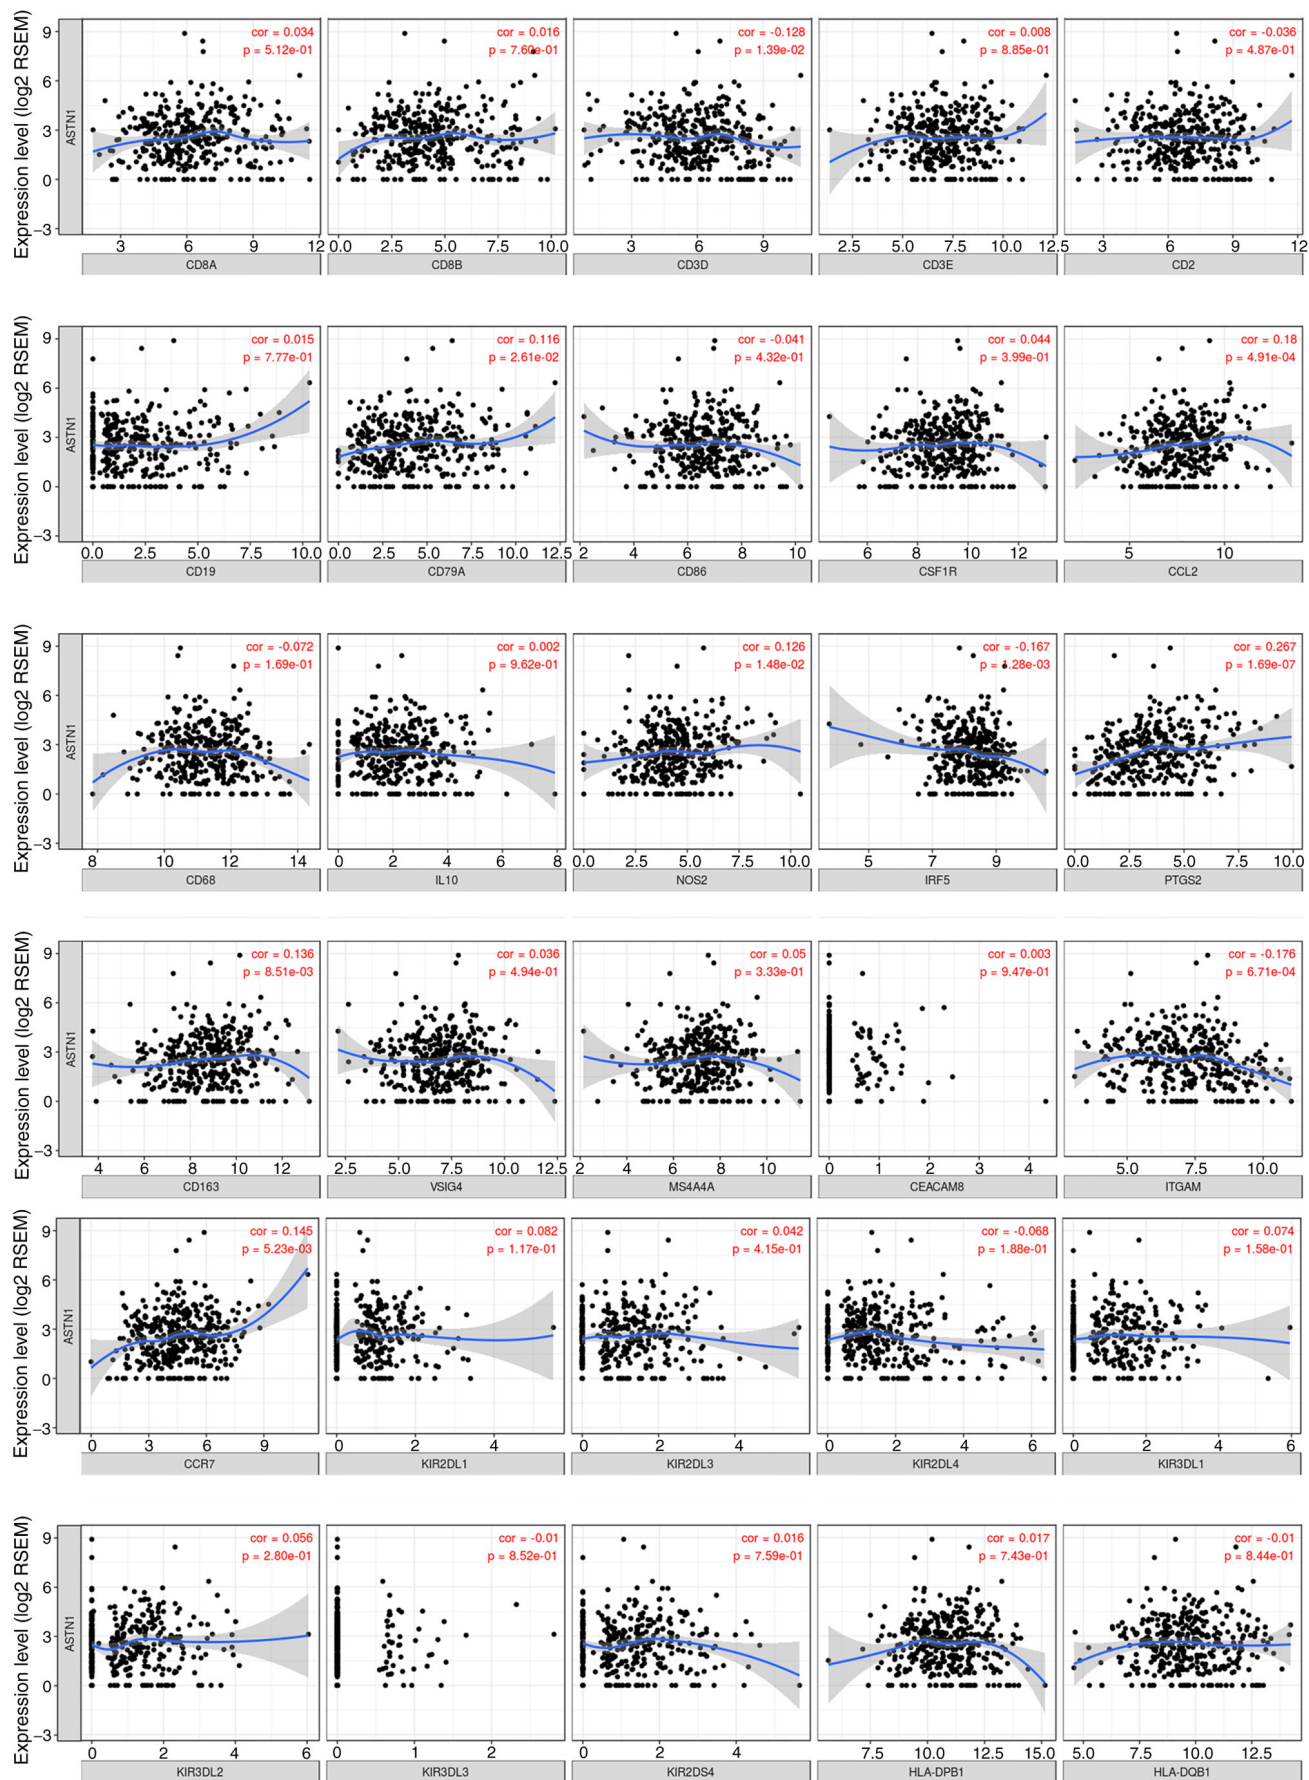

Figure S3. Correlation analysis between ASTN1 expression and immune marker genes. ASTN1, astrotactin 1.

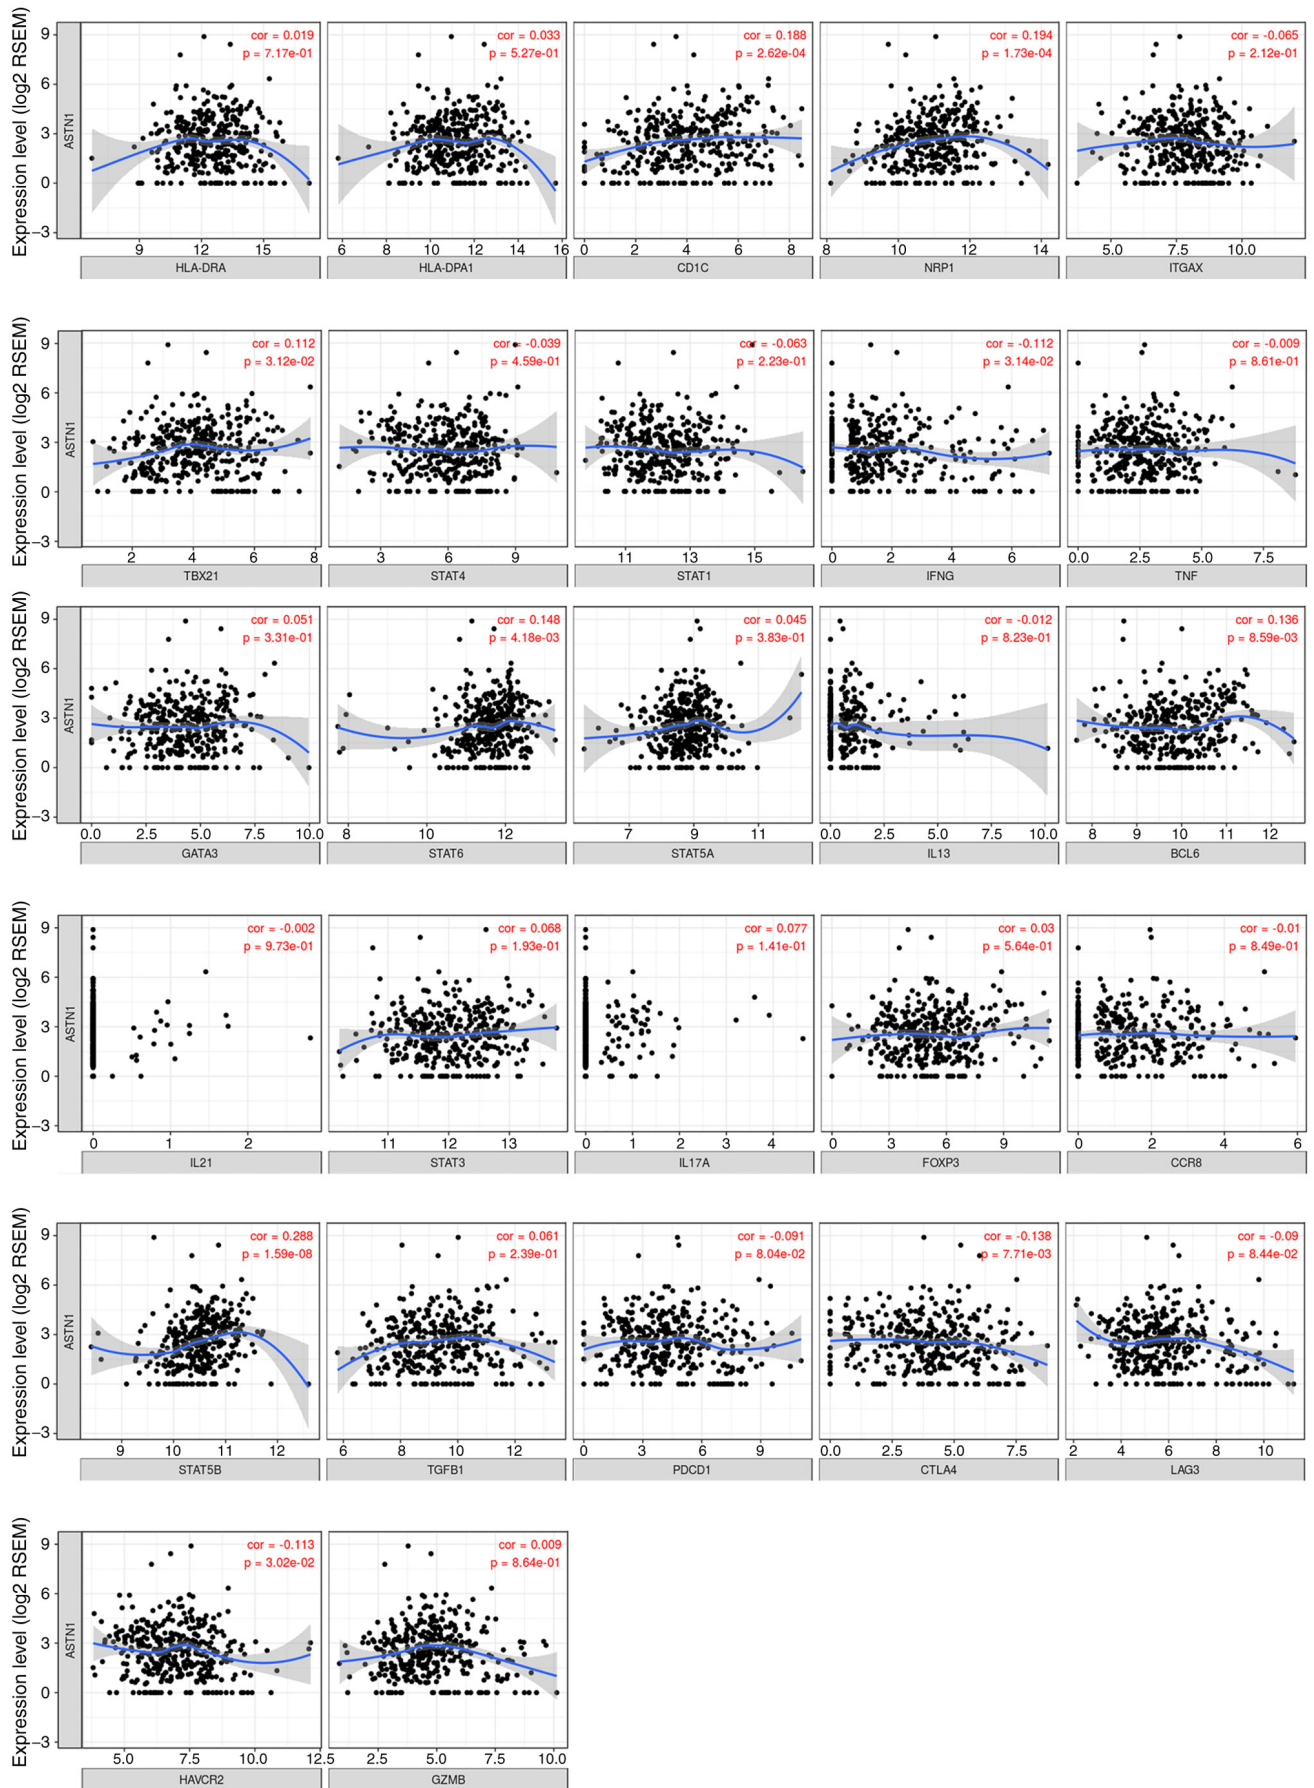

Supplement: Supplementary_Data.pdf [file Supplementary_Data.pdf]
